# Supplementary material for: Exploring the Simultaneous Effect of Total Ion Concentration and K:Ca:Mg Ratio of the Nutrient Solution on the Growth and Nutritional Value of Hydroponically Grown Cichorium spinosum L.
Source: MDPI journal article supplement (doi:10.3390/agronomy12092214), 2022-09-16
Supplement: s1 [file s1]

|                  |                  |                  |                  |
|------------------|------------------|------------------|------------------|
| 13. <i>H-K50</i> | 14. <i>L-K50</i> | 15. <i>H-K40</i> | 16. <i>L-K40</i> |
| 12. <i>L-K50</i> | 11. <i>H-K40</i> | 10. <i>L-K50</i> | 9. <i>H-K50</i>  |
| 5. <i>L-K40</i>  | 6. <i>H-K50</i>  | 7. <i>L-K40</i>  | 8. <i>H-K40</i>  |
| 4. <i>H-K40</i>  | 3. <i>L-K40</i>  | 2. <i>H-K50</i>  | 1. <i>L-K50</i>  |

Figure S1: Positioning of the different hydroponic rafts for the current experimental design.
